# Supplementary material for: Improved energy storage performance of NBTM/STM multilayer films via designing the stacking order
Source: Royal Society of Chemistry journal article supplement (doi:10.1039/d4tc02588a), 2024-01-01
Supplement: d4tc02588a1.pdf [file d4tc02588a1.pdf]

## Supplementary Information

### **Improved energy storage performance of NBTM/STM multilayer films via designing the stacking order**

Qingguo Chi<sup>a,b</sup>, Bo Dong<sup>a,b</sup>, Chao Yin<sup>a,b\*</sup>, Xue Zhang<sup>a,b</sup>, Shimin Sun<sup>a,b</sup>, Changhai  
Zhang<sup>a,b</sup>, Yongquan Zhang<sup>a,b</sup>, Yue Zhang<sup>a,b</sup>, Tiandong Zhang<sup>a,b\*</sup>

<sup>a</sup>Key Laboratory of Engineering Dielectrics and Its Application, Ministry of Education,  
Harbin University of Science and Technology, Harbin 150080, PR China

<sup>b</sup>School of Electrical and Electronic Engineering, Harbin University of Science and  
Technology, Harbin 150080, PR China

\*Corresponding Author: Chao Yin and Tiandong Zhang

E-mail: 1920300043@stu.hrbust.edu.cn and tdzhang@hrbust.edu.cn

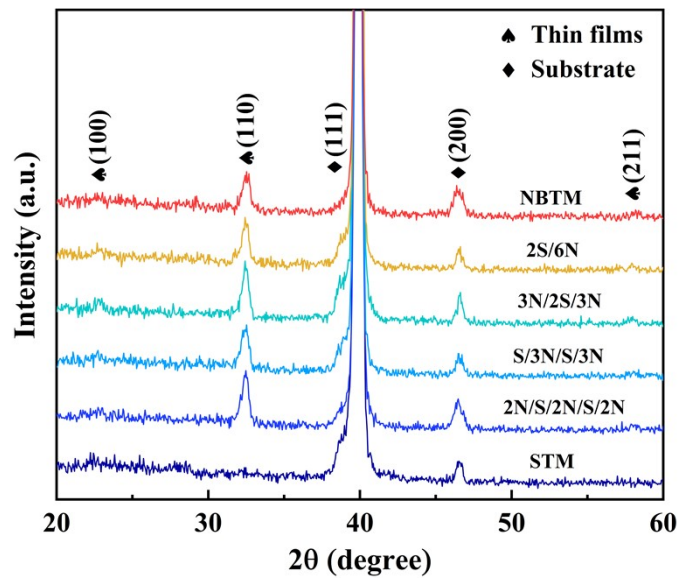

**Fig. S1** The XRD spectrum of the NBTM film, NBTM/STM multilayer films, and STM film.

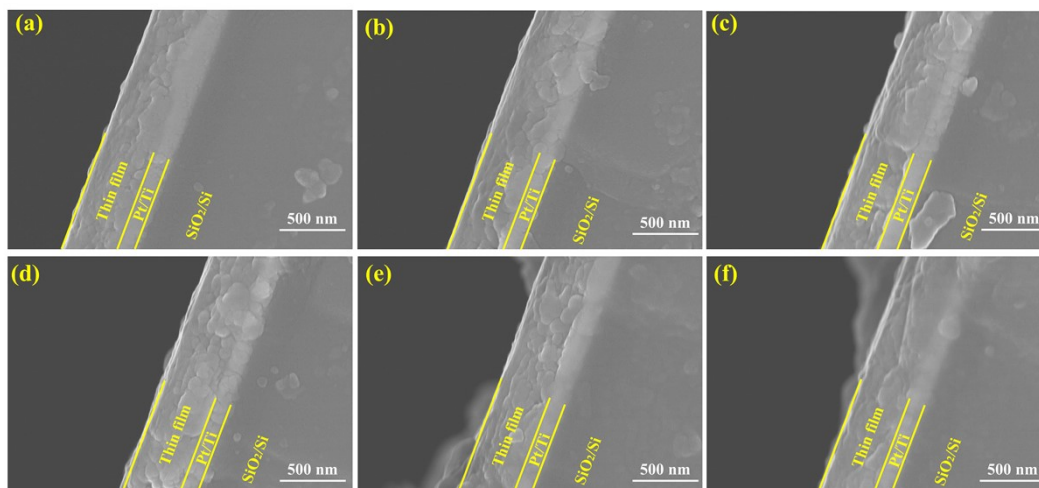

**Fig. S2** Cross-section SEM images of the (a) NBTM, (b) 2S/6N, (c) 3N/2S/3N, (d) S/3N/S/3N, (e) 2N/S/2N/S/2N, and (f) STM films.

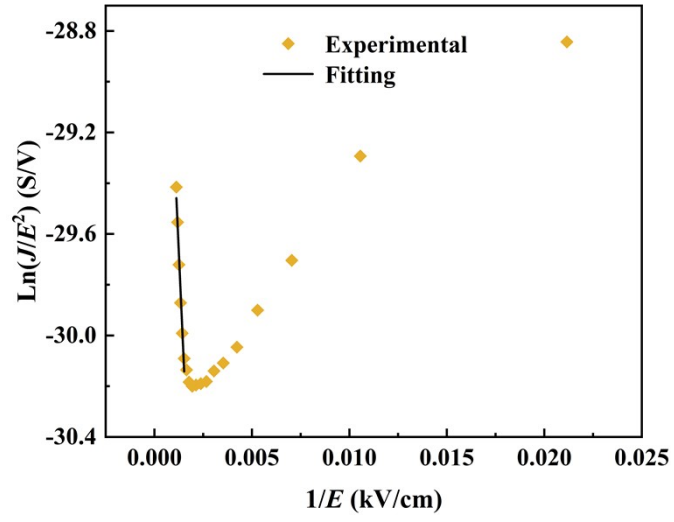

**Fig. S3** Linear fitting of  $1/E$  and  $\ln(J/E^2)$  of the 2S/6N film.

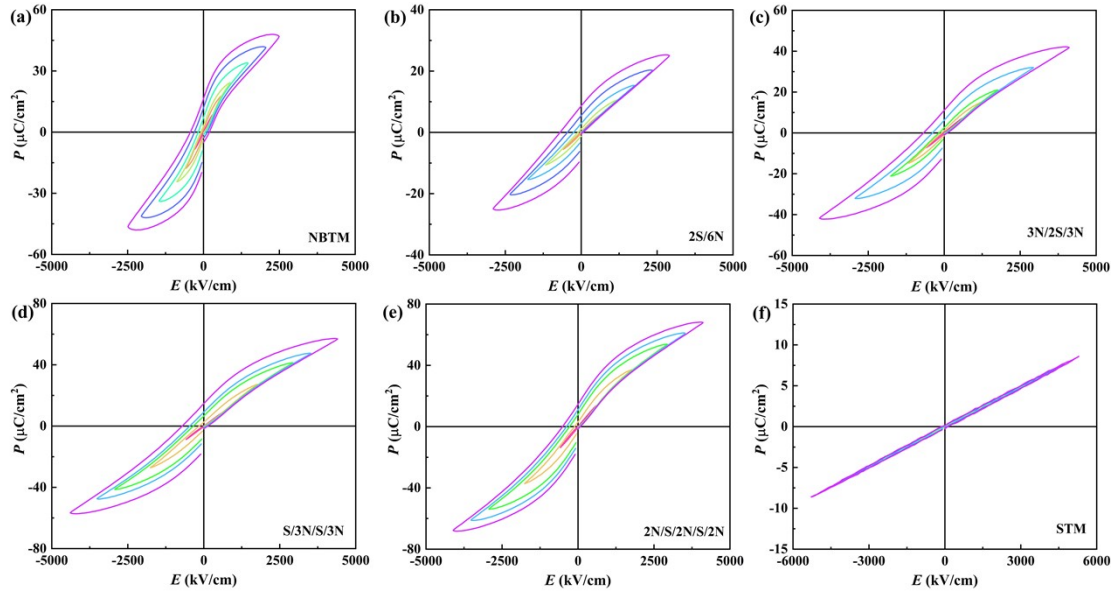

**Fig. S4**  $P$ - $E$  loops of the (a) NBTM, (b) 2S/6N, (c) 3N/2S/3N, (d) S/3N/S/3N, (e) 2N/S/2N/S/2N, and (f) STM films.

**Table 1**

Comparison of energy storage performance of the representative films

| Materials                                                                                     | $W_{\text{rec}}$ (J/cm <sup>3</sup> ) | $\eta$ (%) | $E_b$ (kV/cm) | Thermal stability range (°C) | Ref.      |
|-----------------------------------------------------------------------------------------------|---------------------------------------|------------|---------------|------------------------------|-----------|
| NBTM/STM                                                                                      | 68.9                                  | 54.4       | 4300          | 20-200                       | This work |
| SBLTM                                                                                         | 47.7                                  | 66.5       | 3307          | 30-110                       | [1]       |
| (Sr <sub>0.85</sub> Bi <sub>0.1</sub> )Ti <sub>0.99</sub> Mn <sub>0.01</sub> O <sub>3</sub>   | 24.4                                  | 64.7       | 1982          | 30-110                       | [2]       |
| (Sr <sub>0.925</sub> Bi <sub>0.05</sub> )Ti <sub>0.99</sub> Mn <sub>0.01</sub> O <sub>3</sub> | 23.6                                  | 67.5       | 2281          | -                            | [2]       |
| BFMO-SBT                                                                                      | 61                                    | 75         | 3000          | -50-200                      | [3]       |
| NKBT-BST                                                                                      | 54.8                                  | 76.4       | 3846          | 20-200                       | [4]       |
| BMT/NBT                                                                                       | 53.9                                  | 74.3       | 4105          | 15-115                       | [5]       |
| BMT-STO                                                                                       | 109.7                                 | 80.6       | 3393          | 25-200                       | [6]       |

## References

- [1] X.R. Yang, W.L. Li, Y.L. Zhang, Y.L. Qiao, Y. Yang, W.D. Fei, High energy storage density achieved in  $\text{Bi}^{3+}\text{-Li}^+$  co-doped  $\text{SrTi}_{0.99}\text{Mn}_{0.01}\text{O}_3$  thin film via ionic pair doping-engineering. *Journal of the European Ceramic Society* 40 (2020) 706-711.
- [2] X.R. Yang, W.L. Li, Y.L. Qiao, Y.L. Zhang, J. He, W.D. Fei, High energy-storage density of lead-free  $(\text{Sr}_{1-1.5x}\text{Bi}_x)\text{Ti}_{0.99}\text{Mn}_{0.01}\text{O}_3$  thin films induced by  $\text{Bi}^{3+}\text{-V}_{\text{Sr}}$  dipolar defects. *Physical Chemistry Chemical Physics* 21 (2019) 16359-16366.
- [3] C. Yang, J. Qian, P. Lv, H. Wu, X. Lin, K. Wang, J. Ouyang, S. Huang, X. Cheng, Z. Cheng, Flexible lead-free BFO-based dielectric capacitor with large energy density, superior thermal stability, and reliable bending endurance. *Journal of Materiomics* 6 (2020) 200-208.
- [4] J. Ding, Y. Zhang, Y. Zhai, Z. Su, J. Liu, J. Chen, Z. Pan, Optimized energy storage performances in morphotropic phase boundary  $(\text{Na}_{0.8}\text{K}_{0.2})_{0.5}\text{Bi}_{0.5}\text{TiO}_3$ -based lead-free ferroelectric thin films. *Ceramics International* 48 (2022) 6062-6068.
- [5] C.Y. Yue, H.J. Sun, C. Yan, X.H. Huang, H.T. Sui, Y.L. Hu, Optimized energy storage performance by a depolarization field in  $\text{BaMn}_{0.01}\text{Ti}_{0.99}\text{O}_3/\text{Na}_{0.5}\text{Bi}_{0.5}\text{TiO}_3$  multilayer thin films. *Journal of Materials Chemistry C* 10 (2022) 10356-10364.
- [6] C.W. Bin, X. Hou, H. Yang, L.C. Liao, Y.D. Xie, H. Wei, Y.Y. Liu, X.M. Chen, J. Wang, Flexible lead-free film capacitor based on  $\text{BiMg}_{0.5}\text{Ti}_{0.5}\text{O}_3\text{-SrTiO}_3$  for high-performance energy storage. *Chemical Engineering Journal* 445 (2022) 136728.
